# Supplementary material for: Rapid systematic review on developing web-based interventions to support people affected by cancer
Source: HighWire-hosted journal article supplement (doi:10.1136/bmjopen-2022-062026), 2022-09-01
Supplement: bmjopen-2022-062026supp003_data_supplement.pdf [file bmjopen-2022-062026supp003_data_supplement.pdf]

|                                                                                                               |                                                                              |
|---------------------------------------------------------------------------------------------------------------|------------------------------------------------------------------------------|
| Review title or ID                                                                                            | Hodgkin lymphoma survivor wellness: Development of a web-based intervention. |
| Study ID ( <i>surname of first author and year first full report of study was published e.g. Smith 2001</i> ) | Amweg et al. (2020)                                                          |
| Report ID                                                                                                     | 10.1188/20.CJON.284-289                                                      |
| Report ID of other reports of this study including errata or retractions                                      | N/A                                                                          |
| Notes: N/A                                                                                                    |                                                                              |

### General Information

|                                                                |                                                                                                                                                                                                                                                                          |
|----------------------------------------------------------------|--------------------------------------------------------------------------------------------------------------------------------------------------------------------------------------------------------------------------------------------------------------------------|
| Date form completed ( <i>dd/mm/yyyy</i> )                      | 12/10/2021                                                                                                                                                                                                                                                               |
| Name/ID of person extracting data                              | SC                                                                                                                                                                                                                                                                       |
| Reference citation                                             | Amweg LN, McReynolds J, Lansang K, Jones T, Snow C, Berry DL, Partridge AH, Underhill-Blazey ML. Hodgkin Lymphoma Survivor Wellness: Development of a Web-Based Intervention. Clin J Oncol Nurs. 2020 Jun 1;24(3):284-289. doi: 10.1188/20.CJON.284-289. PMID: 32441674. |
| Study author contact details                                   | Could not access                                                                                                                                                                                                                                                         |
| Publication type ( <i>e.g. full report, abstract, letter</i> ) | Full report                                                                                                                                                                                                                                                              |
| Notes: N/A                                                     |                                                                                                                                                                                                                                                                          |

### Study eligibility

| Study Characteristics | Eligibility criteria<br><i>(Insert inclusion criteria for each characteristic as defined in the Protocol)</i> | Eligibility criteria met?           |                          |                          | Location in text or source ( <i>pg &amp; ¶/fig/table/other</i> )                         |
|-----------------------|---------------------------------------------------------------------------------------------------------------|-------------------------------------|--------------------------|--------------------------|------------------------------------------------------------------------------------------|
|                       |                                                                                                               | Yes                                 | No                       | Unclear                  |                                                                                          |
| Type of study         | Quantitative design                                                                                           | <input type="checkbox"/>            | <input type="checkbox"/> | <input type="checkbox"/> |                                                                                          |
|                       | Qualitative design                                                                                            | <input type="checkbox"/>            | <input type="checkbox"/> | <input type="checkbox"/> |                                                                                          |
|                       | Mixed methods design                                                                                          | <input checked="" type="checkbox"/> | <input type="checkbox"/> | <input type="checkbox"/> | Page 1 – Abstract<br>Page 2 – methods – Focus groups – Development and usability testing |
|                       | Other (Please specify)                                                                                        |                                     |                          |                          |                                                                                          |

|                              |                                                 |                                                                                       |                                                     |
|------------------------------|-------------------------------------------------|---------------------------------------------------------------------------------------|-----------------------------------------------------|
| <b>Participants</b>          | Cancer (Specify what type)                      | <input checked="" type="checkbox"/> <input type="checkbox"/> <input type="checkbox"/> | Page 2 – Participant identification and recruitment |
|                              | Caregiver                                       | <input type="checkbox"/> <input type="checkbox"/> <input type="checkbox"/>            |                                                     |
|                              | Friends/family                                  | <input type="checkbox"/> <input type="checkbox"/> <input type="checkbox"/>            |                                                     |
| <b>Types of intervention</b> | Website/Internet-based cancer support programme | <input checked="" type="checkbox"/> <input type="checkbox"/> <input type="checkbox"/> | Page 2 – Design and setting                         |

|                                                                                                                                                                                                                                                                                                                                                            |                                                            |                                                                                       |                                                       |
|------------------------------------------------------------------------------------------------------------------------------------------------------------------------------------------------------------------------------------------------------------------------------------------------------------------------------------------------------------|------------------------------------------------------------|---------------------------------------------------------------------------------------|-------------------------------------------------------|
| <b>Type of data (quant and/or qual)</b><br><br>(Reports primary data on any of the following)                                                                                                                                                                                                                                                              | User experience/Needs/Preferences                          | <input checked="" type="checkbox"/> <input type="checkbox"/> <input type="checkbox"/> | Page 2 – Focus groups                                 |
|                                                                                                                                                                                                                                                                                                                                                            | Usability/Acceptability/Feasibility                        | <input checked="" type="checkbox"/> <input type="checkbox"/> <input type="checkbox"/> | Page 2 – Development and individual usability testing |
|                                                                                                                                                                                                                                                                                                                                                            | Functionality                                              | <input type="checkbox"/> <input type="checkbox"/> <input type="checkbox"/>            |                                                       |
|                                                                                                                                                                                                                                                                                                                                                            | Design on web                                              | <input type="checkbox"/> <input type="checkbox"/> <input type="checkbox"/>            |                                                       |
|                                                                                                                                                                                                                                                                                                                                                            | Internet-based support living with and affected by cancer. | <input type="checkbox"/> <input type="checkbox"/> <input type="checkbox"/>            |                                                       |
| INCLUDE <input checked="" type="checkbox"/>                                                                                                                                                                                                                                                                                                                |                                                            | EXCLUDE <input type="checkbox"/>                                                      |                                                       |
| Reason for exclusion                                                                                                                                                                                                                                                                                                                                       |                                                            |                                                                                       |                                                       |
| <p>Notes:</p> <p>The aim of this article was to adapt and evaluate a previously developed survivorship care website for Hodgkin Lymphoma survivors.</p> <p>A mixed methods design broken down into phases</p> <ol style="list-style-type: none"> <li>1) Focus group interviews – user needs</li> <li>2) Web design and user testing – usability</li> </ol> |                                                            |                                                                                       |                                                       |

**DO NOT PROCEED IF STUDY EXCLUDED FROM REVIEW**

## Characteristics of included studies

### Methods

|                                                                                                       | Descriptions as stated in report/paper                                                                                                                                                                                                                                 | Location in text or source (pg & ¶/fig/table/other)                 |
|-------------------------------------------------------------------------------------------------------|------------------------------------------------------------------------------------------------------------------------------------------------------------------------------------------------------------------------------------------------------------------------|---------------------------------------------------------------------|
| <b>Aim of study</b> (e.g. efficacy, equivalence, pragmatic)                                           | The aim of this article was to adapt and evaluate a previously developed survivorship care website for Hodgkin Lymphoma survivors.                                                                                                                                     | Page 1 – Abstract<br>Page 2 – Introduction – paragraph 2            |
| <b>Participants</b> (e.g. Type of cancer, caregiver role, family and friend's role)                   | Hodgekins Lymphoma survivors                                                                                                                                                                                                                                           | Page 2 – Methods – Participant identification and recruitment       |
| <b>Design</b> (e.g. parallel, crossover, non-RCT, exploratory)                                        | Mixed methods user centred design – two phases<br>1) Focus groups<br>2) Development and individual usability testing                                                                                                                                                   | Page 2 – Methods – Focus groups – Development and usability testing |
| <b>Outcomes</b> (details of primary data e.g. user experience, usability, functionality, design etc ) | User needs/preferences and usability of web-resource                                                                                                                                                                                                                   | Page 2 – Methods – Focus groups – Development and usability testing |
| <b>Start/End date</b>                                                                                 |                                                                                                                                                                                                                                                                        |                                                                     |
| <b>Ethical approval needed/ obtained for study</b>                                                    | <input checked="" type="checkbox"/> Yes <input type="checkbox"/> No <input type="checkbox"/> Unclear<br>The Dana-Farber/Harvard Cancer Centre Institutional Review Board approved all study procedures. The study was conducted from April 2017 through December 2018. | Page 2 – Methods – Design and setting.                              |

**Notes:**
